# Supplementary material
Source: publisher figshare collection journal article supplement (https://sage.figshare.com/ndownloader/files/20420622)

Online Appendix C: Color Touchpoint Image Card (reproduced from figure 2)


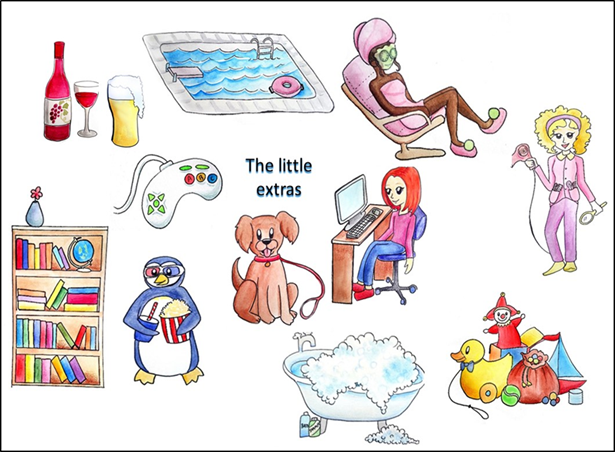

Supplement: Supplementary file 1 [file 20420622]
